# Supplementary material for: Label-free isolation and deposition of single bacterial cells from heterogeneous samples for clonal culturing
Source: PubMed Central journal article supplement (PMC5011771; doi:10.1038/srep32837), 2016-09-06
Supplement: srep32837-s1.pdf [file srep32837-s1.pdf]

# Supplemental material

1  
2  
3  
4  
5  
6  
7  
8  
9  
10  
11  
12  
13  
14  
15

## **Label-free isolation and deposition of single bacterial cells from heterogeneous samples for clonal culturing**

J. Riba<sup>†\*,1</sup>, T. Gleichmann<sup>†,1</sup>, S. Zimmermann<sup>1</sup>, R. Zengerle<sup>1,2,3</sup>, P. Koltay<sup>1</sup>

<sup>1</sup>Laboratory for MEMS Applications, Department of Microsystems Engineering - IMTEK, University of Freiburg, Georges-Koehler-Allee 103, 79110 Freiburg, Germany

<sup>2</sup>Hahn-Schickard, Georges-Koehler-Allee 103, 79110 Freiburg, Germany

<sup>3</sup>BIOSS – Centre for Biological Signalling Studies, University of Freiburg, 79110 Freiburg, Germany

\* Corresponding author

† These authors contributed equally

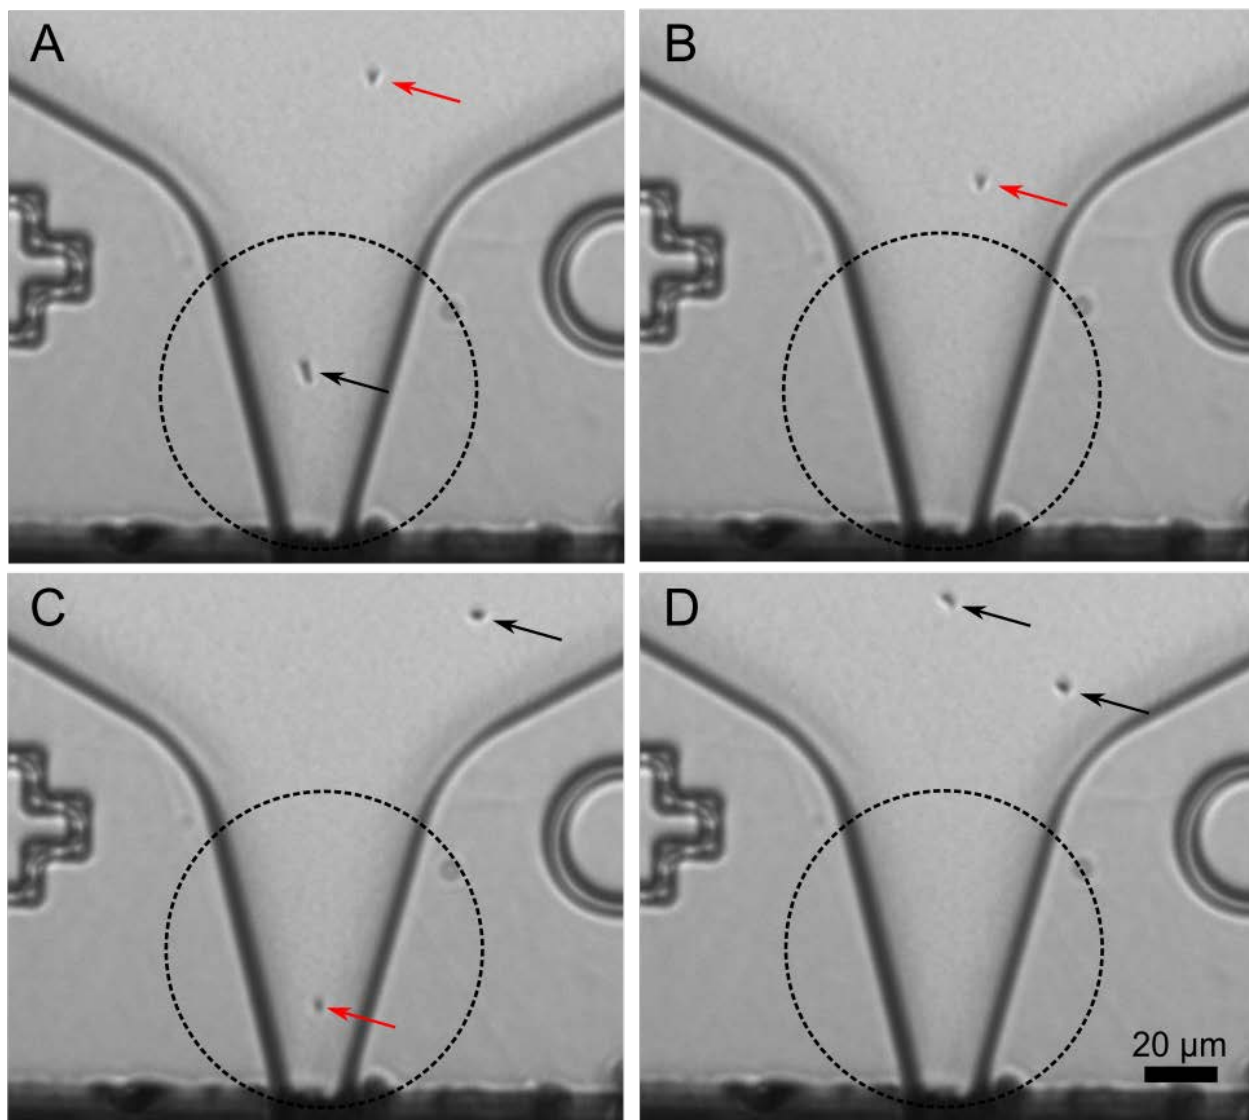

16

17

18 Supplemental Figure S1. The camera of the SCP is synchronized with the piezo actuator that  
19 generates the droplets. For each dispensed cell four images showing the nozzle of the dispenser  
20 chip are stored automatically by the instrument. The SCP images can be examined manually to  
21 assess whether truly a single cell was ejected from the nozzle. Here, a single *B. subtilis* cell (red  
22 arrow) is detected and printed. (A): image of the nozzle region two piezo actuations before  
23 detection, (B): one piezo actuation before detection, (C): at the time of detection, and (D):  
24 after the single cell has been ejected with the droplet. Only the droplet produced in (C) passes the  
25 vacuum shutter and is deposited on the substrate.

26

27

28 Supplemental Table S1. Cells of various species were deposited into 96-well plates for  
 29 subsequent cultivation. The SCP images were assessed to determine whether a single cell, no  
 30 cell, or multiple cells were ejected from the nozzle. The data is summarized in the manuscript in  
 31 Figure 3.

| Organism           | MTP   | No cell printed |       | Multiple cells printed |       | Wells occupied |     | Single cells grown to culture |     |
|--------------------|-------|-----------------|-------|------------------------|-------|----------------|-----|-------------------------------|-----|
| <i>E.coli</i>      | MTP1  | 0               | 0.0%  | 1                      | 1.0%  | 81             | 84% | 80                            | 84% |
|                    | MTP2  | 0               | 0.0%  | 1                      | 1.0%  | 83             | 86% | 82                            | 86% |
|                    | MTP3  | 0               | 0.0%  | 1                      | 1.0%  | 80             | 83% | 79                            | 83% |
|                    | MTP4  | 0               | 0.0%  | 7                      | 7.3%  | 92             | 96% | 85                            | 96% |
|                    | MTP5  | 0               | 0.0%  | 3                      | 3.1%  | 76             | 79% | 73                            | 78% |
| <i>E.coli</i>      | MTP6  | 5               | 5.2%  | 5                      | 5.2%  | 76             | 79% | 72                            | 84% |
|                    | MTP7  | 0               | 0.0%  | 6                      | 6.3%  | 75             | 89% | 69                            | 88% |
|                    | MTP8  | 2               | 2.1%  | 9                      | 9.4%  | 73             | 76% | 64                            | 75% |
|                    | MTP9  | 0               | 0.0%  | 6                      | 6.3%  | 82             | 85% | 76                            | 84% |
|                    | MTP10 | 0               | 0.0%  | 5                      | 5.2%  | 81             | 84% | 76                            | 84% |
| <i>E.faecalis</i>  | MTP1  | 0               | 0.0%  | 5                      | 5.2%  | 89             | 93% | 84                            | 92% |
|                    | MTP2  | 0               | 0.0%  | 12                     | 12.5% | 87             | 91% | 78                            | 93% |
|                    | MTP3  | 1               | 1.0%  | 8                      | 8.3%  | 83             | 86% | 75                            | 86% |
|                    | MTP4  | 0               | 0.0%  | 7                      | 7.3%  | 91             | 95% | 84                            | 94% |
|                    | MTP5  | 0               | 0.0%  | 6                      | 6.3%  | 89             | 93% | 83                            | 92% |
| <i>E.faecalis</i>  | MTP6  | 1               | 1.0%  | 4                      | 4.2%  | 82             | 85% | 77                            | 85% |
|                    | MTP7  | 5               | 5.2%  | 7                      | 7.3%  | 87             | 91% | 80                            | 95% |
|                    | MTP8  | 3               | 3.1%  | 9                      | 9.4%  | 81             | 90% | 73                            | 94% |
|                    | MTP9  | 6               | 6.3%  | 6                      | 6.3%  | 55             | 86% | 50                            | 96% |
|                    | MTP10 | 3               | 3.1%  | 5                      | 5.2%  | 57             | 89% | 51                            | 91% |
| <i>B. subtilis</i> | MTP1  | 4               | 4.2%  | 1                      | 1.0%  | 70             | 73% | 68                            | 75% |
|                    | MTP2  | 5               | 5.2%  | 4                      | 4.2%  | 64             | 67% | 59                            | 68% |
|                    | MTP3  | 4               | 4.2%  | 4                      | 4.2%  | 67             | 74% | 64                            | 78% |
|                    | MTP4  | 0               | 0.0%  | 0                      | 0.0%  | 43             | 67% | 43                            | 67% |
|                    | MTP5  | 0               | 0.0%  | 7                      | 7.3%  | 75             | 78% | 69                            | 78% |
| <i>B. subtilis</i> | MTP6  | 2               | 2.3%  | 0                      | 0.0%  | 81             | 92% | 80                            | 93% |
|                    | MTP7  | 6               | 7.5%  | 0                      | 0.0%  | 64             | 80% | 64                            | 86% |
|                    | MTP8  | 3               | 3.4%  | 1                      | 1.1%  | 79             | 90% | 78                            | 93% |
|                    | MTP9  | 3               | 3.4%  | 1                      | 1.1%  | 76             | 86% | 75                            | 89% |
|                    | MTP10 | 13              | 13.5% | 0                      | 0.0%  | 75             | 78% | 72                            | 87% |
